# Supplementary material
Source: PubMed Central journal article supplement (PMC3784824)
Supplement: supp_jcs.132381_JCS132381.pdf [file supp_jcs.132381_JCS132381.pdf]

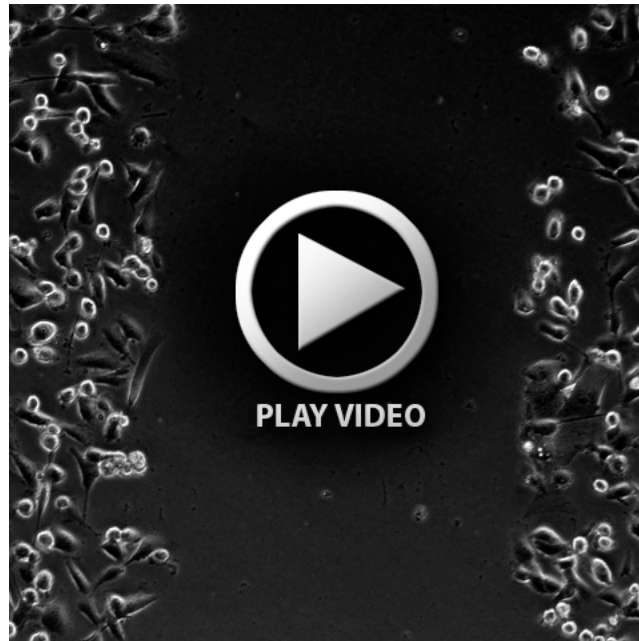

**Movie 1. Time-lapse movie of control siRNA-transfected MDA-MB-231 cells migrating into the wound space.** MDA-MB-231 cells were transfected with control siRNA and plated on collagen-1-coated dishes. 72 h after transfection, monolayer were “wounded”, stimulated with CXCL12, and brightfield images were taken every 30 min for 24 hours to create a time-lapse movie.

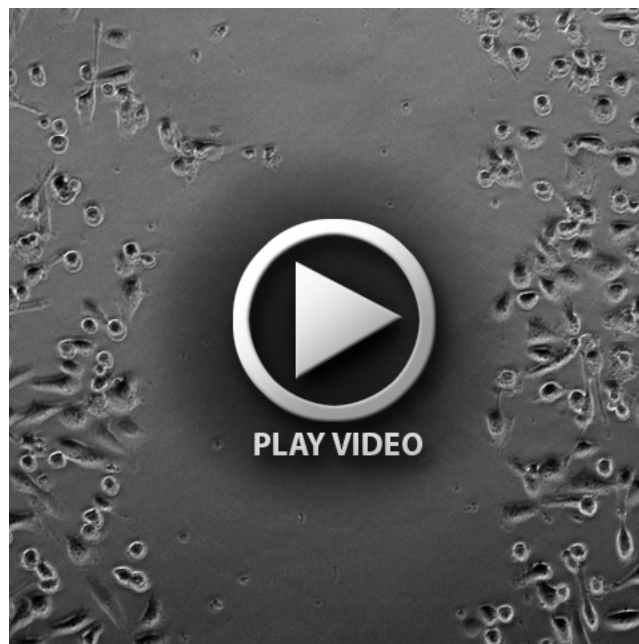

**Movie 2. Time-lapse movie of PRG siRNA-transfected MDA-MB-231 cells migrating in to the wound space.** MDA-MB-231 cells were transfected with PRG siRNA and plated on collagen-1-coated dishes. 72 h after transfection, monolayer were “wounded”, stimulated with CXCL12, and brightfield images were taken every 30 min for 24 hours to create a time-lapse movie.
